# Supplementary material
Source: PubMed Central journal article supplement (PMC2748895)

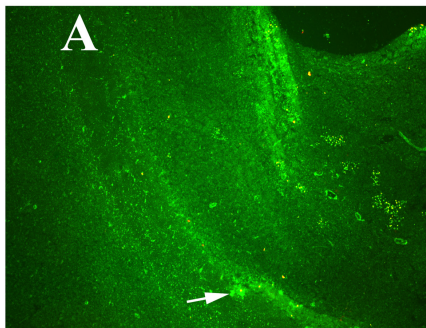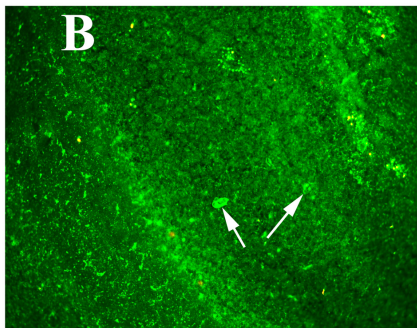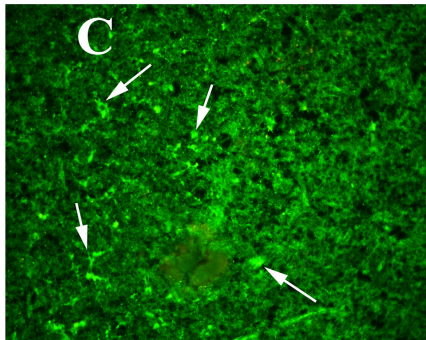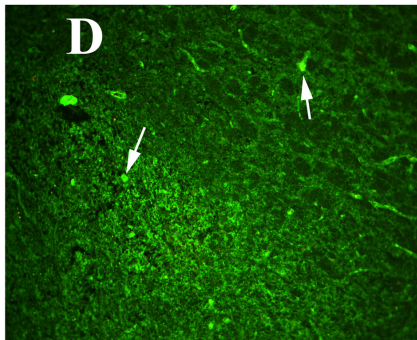

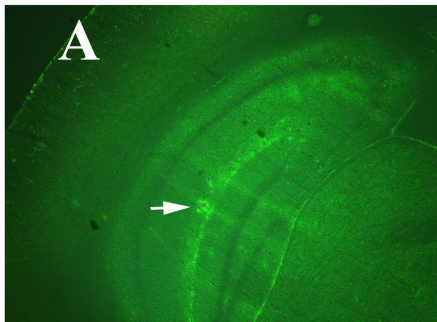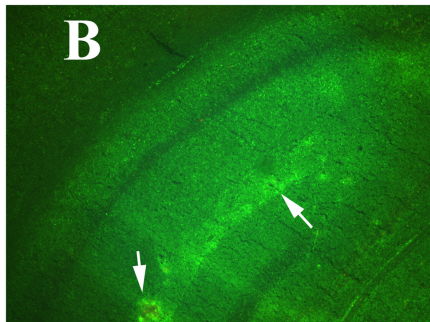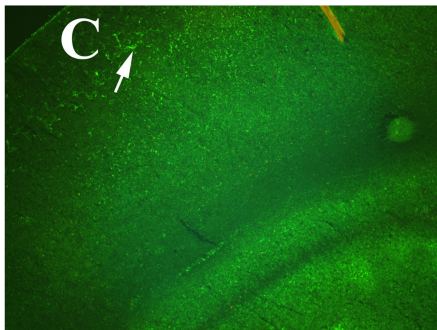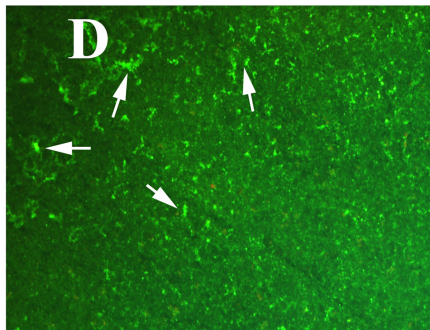

**A**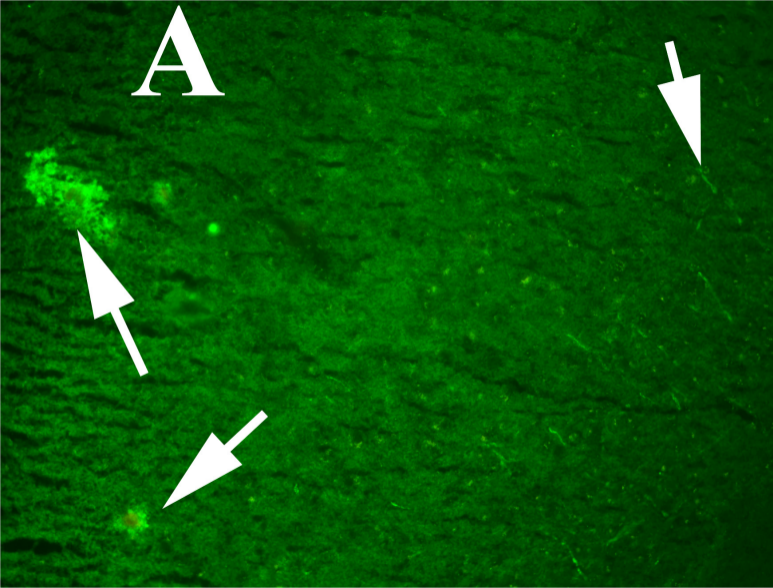**B**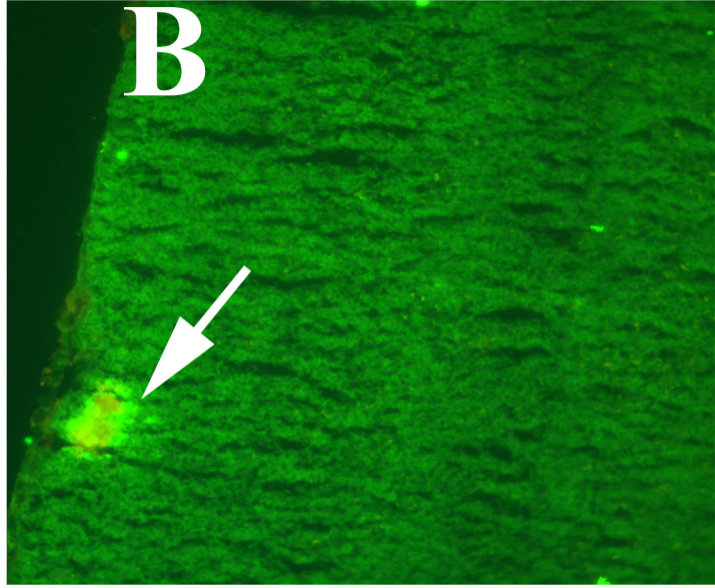

Supplement: ddp331_1.pdf [file ddp331_1.pdf]
